# Supplementary material for: Exploring the Gut Microbiome and Metabolome in Individuals with Alopecia Areata Disease
Source: MDPI journal article supplement (doi:10.3390/nu16060858), 2024-03-15
Supplement: s1 [file s1]

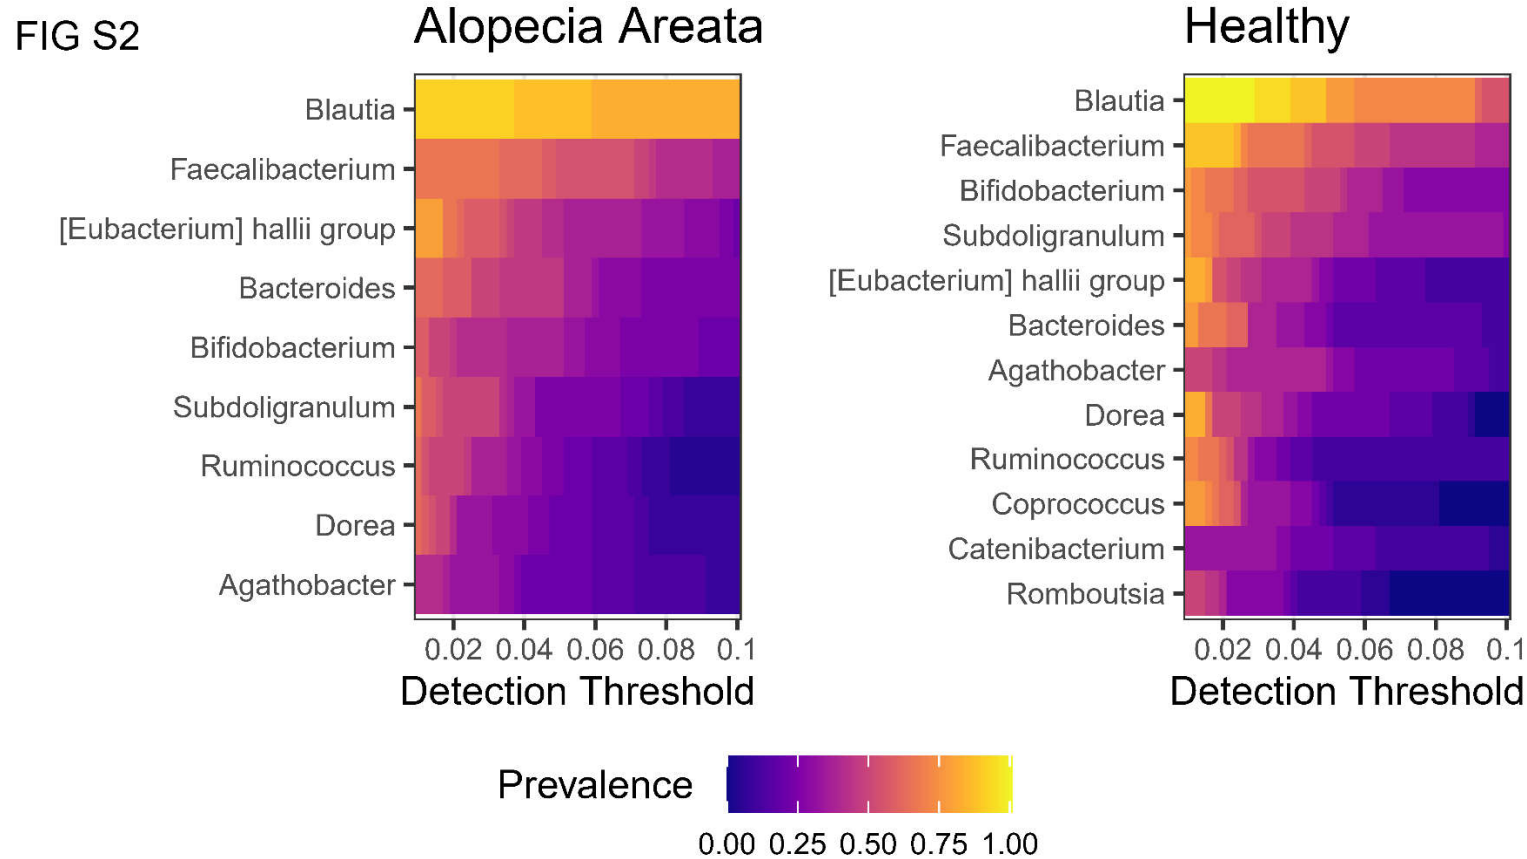

**Figure S2.** Core microbiome at the genus level of bacteria present in more than 50% of the samples detected in various abundance levels with the lowest set at 0.01%. Core microbiome was determined for 18 Healthy individuals (HI) and 24 Alopecia Areata (AA) patients.

**Table S1.** Analysis of variance (ANOVA) significant terms and explained alpha diversity indexes variance (%).

| <b>Diversity Index</b> | <b>Variables</b>          | <b>Pr(&gt;F)</b> | <b>Variance Explained %</b> |
|------------------------|---------------------------|------------------|-----------------------------|
| Chao1                  | AgeRange                  | 0.931            | 0.256                       |
| Chao1                  | Gender                    | 0.0895           | 5.49                        |
| Chao1                  | Pathology                 | 0.000203         | 31.6                        |
| Chao1                  | AgeRange:Gender           | 0.758            | 0.998                       |
| Chao1                  | AgeRange:Pathology        | 0.199            | 6.09                        |
| Chao1                  | Gender:Pathology          | 0.759            | 0.171                       |
| Chao1                  | AgeRange:Gender:Pathology | 0.976            | 0.00161                     |
| Chao1                  | Residuals                 | NA               | 55.4                        |
| Shannon                | AgeRange                  | 0.67             | 1.53                        |
| Shannon                | Gender                    | 0.137            | 4.41                        |
| Shannon                | Pathology                 | 0.000775         | 26.2                        |
| Shannon                | AgeRange:Gender           | 0.707            | 1.32                        |
| Shannon                | AgeRange:Pathology        | 0.14             | 7.92                        |
| Shannon                | Gender:Pathology          | 0.962            | 0.0044                      |
| Shannon                | AgeRange:Gender:Pathology | 0.921            | 0.0191                      |
| Shannon                | Residuals                 | NA               | 58.6                        |

**Table S2.** Permutational multivariate ANOVA (PERMANOVA), significant variables and their  $R^2$  (%) on microbiome data from 18 healthy individuals (HI) and 24 Alopecia Aerata (AA) patients.

| <b>Variables</b>   | <b>Pr(&gt;F)</b> | <b>R<sup>2</sup></b> |
|--------------------|------------------|----------------------|
| Pathology          | 0.06             | 3.39                 |
| Gender             | 0.73             | 2.40                 |
| AgeRange           | 0.06             | 6.39                 |
| Pathology:Gender   | 0.69             | 2.43                 |
| Pathology:AgeRange | 0.13             | 6.33                 |
| Gender:AgeRange    | 0.03             | 6.86                 |
| Residual           | NA               | 72.21                |
| Total              | NA               | 100.00               |
